# Supplementary material
Source: PubMed Central journal article supplement (PMC5570664)

## Supplemental Material

### Short-term Exposure to Ambient Air Pollution and Biomarkers of Systemic Inflammation: The Framingham Heart Study

Wenyuan Li, SD<sup>1,2</sup>, Kirsten S. Dorans, SD<sup>1,2</sup>, Elissa H. Wilker, ScD<sup>2,3</sup>, Mary B. Rice, MD, MPH<sup>4</sup>, Petter L. Ljungman, MD, PhD<sup>2,5</sup>, Joel D. Schwartz, PhD<sup>1,3</sup>, Brent A. Coull, PhD<sup>6</sup>, Petros Koutrakis, PhD<sup>3</sup>, Diane R. Gold, MD, MPH<sup>3,7</sup>, John F. Keaney, Jr, MD<sup>8</sup>; Ramachandran S. Vasan, MD<sup>9,10,11</sup>, Emelia J. Benjamin, MD, ScM<sup>9,10,11</sup>, Murray A. Mittleman, MD, Dr.PH<sup>1,2</sup>

<sup>1</sup>Department of Epidemiology, Harvard T.H. Chan School of Public Health, Boston, MA

<sup>2</sup>Cardiovascular Epidemiology Research Unit, Division of Cardiology, Beth Israel Deaconess Medical Center, Harvard Medical School, Boston, MA

<sup>3</sup>Department of Environmental Health, Harvard T.H. Chan School of Public Health, Boston, MA

<sup>4</sup>Division of Pulmonary, Critical Care and Sleep Medicine, Beth Israel Deaconess Medical Center, Boston, MA

<sup>5</sup>Institute of Environmental Medicine, Karolinska Institutet, Stockholm, Sweden

<sup>6</sup>Department of Biostatistics, Harvard T.H. Chan School of Public Health, Boston, MA

<sup>7</sup>Channing Division of Network Medicine, Brigham and Women's Hospital and Harvard Medical School, Boston, MA

<sup>8</sup>Division of Cardiovascular Medicine, University of Massachusetts Medical School, Worcester, MA

<sup>9</sup>National Heart, Lung, and Blood Institute's and Boston University's Framingham Heart Study, Framingham, MA

<sup>10</sup>Preventive Medicine and Cardiovascular Medicine Sections, Department of Medicine, Boston University School of Medicine, Boston, MA

<sup>11</sup>Department of Epidemiology, Boston University School of Public Health, Boston, MA

**Supplemental Table I.** Characteristics of the 1- to 7-day moving averages of measured pollutants among participants from the Framingham Offspring cohort examination 7 (1998-2001), examination 8 (2005-2008), Third Generation cohort examination 1 (2002-2005), and examination 2 (2008-2011).

|                                                   | Day Moving Average | N    | Mean | Standard Deviation | Interquartile Range |
|---------------------------------------------------|--------------------|------|------|--------------------|---------------------|
| PM <sub>2.5</sub> , µg/m <sup>3</sup>             | 1                  | 6800 | 9.7  | 5.8                | 5.7                 |
|                                                   | 2                  | 6812 | 9.6  | 5.1                | 5.1                 |
|                                                   | 3                  | 6812 | 9.6  | 4.5                | 4.9                 |
|                                                   | 5                  | 6814 | 9.6  | 3.8                | 4.3                 |
|                                                   | 7                  | 6814 | 9.6  | 3.5                | 4.0                 |
| BC, µg/m <sup>3</sup>                             | 1                  | 6793 | 0.8  | 0.4                | 0.5                 |
|                                                   | 2                  | 6801 | 0.7  | 0.4                | 0.5                 |
|                                                   | 3                  | 6797 | 0.7  | 0.3                | 0.4                 |
|                                                   | 5                  | 6814 | 0.7  | 0.3                | 0.4                 |
|                                                   | 7                  | 6814 | 0.7  | 0.2                | 0.3                 |
| SO <sub>4</sub> <sup>2-</sup> , µg/m <sup>3</sup> | 1                  | 5921 | 2.9  | 2.4                | 2.2                 |
|                                                   | 2                  | 6256 | 2.9  | 2.1                | 2.0                 |
|                                                   | 3                  | 6141 | 2.9  | 1.9                | 1.8                 |
|                                                   | 5                  | 6232 | 2.9  | 1.6                | 1.7                 |
|                                                   | 7                  | 6027 | 2.9  | 1.5                | 1.5                 |
| NO <sub>x</sub> , ppb                             | 1                  | 6510 | 36.5 | 20.0               | 19.0                |
|                                                   | 2                  | 6510 | 35.3 | 17.3               | 18.3                |
|                                                   | 3                  | 6510 | 34.8 | 15.4               | 17.4                |
|                                                   | 5                  | 6510 | 34.4 | 13.3               | 15.9                |
|                                                   | 7                  | 6500 | 34.9 | 12.5               | 15.3                |
| O <sub>3</sub> , ppb                              | 1                  | 6805 | 23.7 | 10.9               | 14.4                |
|                                                   | 2                  | 6812 | 24.1 | 9.9                | 13.7                |
|                                                   | 3                  | 6812 | 24.3 | 9.2                | 13.2                |
|                                                   | 5                  | 6814 | 24.4 | 8.5                | 12.8                |
|                                                   | 7                  | 6814 | 24.2 | 8.1                | 12.5                |

Abbreviation: PM<sub>2.5</sub>, fine particulate matter; BC, black carbon; SO<sub>4</sub><sup>2-</sup>, sulfate; NO<sub>x</sub>, nitrogen oxides; O<sub>3</sub>, ozone.

**Supplemental Table II.** Spearman correlation coefficients between moving averages of measured air pollutants among participants from the Framingham Offspring cohort examination 7 (1998-2001), examination 8 (2005-2008), Third Generation cohort examination 1 (2002-2005), and examination 2 (2008-2011).

| Day<br>Moving<br>Average      | PM <sub>2.5</sub> |      |      |      | BC   |      |      |      |      | SO <sub>4</sub> <sup>2-</sup> |      |      |      |      | NO <sub>x</sub> |      |      |      |       | O <sub>3</sub> |       |       |       |       |      |
|-------------------------------|-------------------|------|------|------|------|------|------|------|------|-------------------------------|------|------|------|------|-----------------|------|------|------|-------|----------------|-------|-------|-------|-------|------|
|                               | 2                 | 3    | 5    | 7    | 1    | 2    | 3    | 5    | 7    | 1                             | 2    | 3    | 5    | 7    | 1               | 2    | 3    | 5    | 7     | 1              | 2     | 3     | 5     | 7     |      |
| PM <sub>2.5</sub>             | 1                 | 0.84 | 0.69 | 0.56 | 0.51 | 0.73 | 0.63 | 0.52 | 0.42 | 0.37                          | 0.82 | 0.62 | 0.50 | 0.39 | 0.34            | 0.43 | 0.42 | 0.34 | 0.25  | 0.21           | 0.02  | 0.00  | 0.00  | 0.02  | 0.02 |
|                               | 2                 | 1    | 0.90 | 0.73 | 0.66 | 0.64 | 0.73 | 0.68 | 0.54 | 0.48                          | 0.74 | 0.81 | 0.70 | 0.54 | 0.45            | 0.31 | 0.41 | 0.40 | 0.29  | 0.24           | 0.04  | 0.03  | 0.02  | 0.03  | 0.04 |
|                               | 3                 |      | 1    | 0.86 | 0.77 | 0.55 | 0.67 | 0.73 | 0.64 | 0.56                          | 0.63 | 0.77 | 0.82 | 0.66 | 0.56            | 0.24 | 0.33 | 0.38 | 0.32  | 0.27           | 0.04  | 0.04  | 0.04  | 0.05  | 0.05 |
|                               | 5                 |      |      | 1    | 0.92 | 0.46 | 0.56 | 0.64 | 0.73 | 0.66                          | 0.52 | 0.64 | 0.75 | 0.81 | 0.70            | 0.18 | 0.25 | 0.29 | 0.34  | 0.31           | 0.03  | 0.03  | 0.04  | 0.05  | 0.05 |
|                               | 7                 |      |      |      | 1    | 0.41 | 0.50 | 0.58 | 0.69 | 0.73                          | 0.47 | 0.56 | 0.67 | 0.76 | 0.80            | 0.15 | 0.20 | 0.24 | 0.28  | 0.31           | 0.04  | 0.04  | 0.05  | 0.07  | 0.07 |
| BC                            | 1                 |      |      |      | 1    | 0.87 | 0.74 | 0.61 | 0.55 | 0.55                          | 0.44 | 0.37 | 0.30 | 0.25 | 0.58            | 0.51 | 0.39 | 0.26 | 0.21  | -0.25          | -0.21 | -0.16 | -0.10 | -0.08 |      |
|                               | 2                 |      |      |      |      | 1    | 0.91 | 0.74 | 0.66 | 0.50                          | 0.55 | 0.48 | 0.38 | 0.31 | 0.44            | 0.55 | 0.47 | 0.32 | 0.26  | -0.18          | -0.22 | -0.19 | -0.12 | -0.10 |      |
|                               | 3                 |      |      |      |      |      | 1    | 0.86 | 0.76 | 0.44                          | 0.54 | 0.57 | 0.46 | 0.38 | 0.33            | 0.45 | 0.50 | 0.37 | 0.30  | -0.15          | -0.18 | -0.20 | -0.14 | -0.11 |      |
|                               | 5                 |      |      |      |      |      |      | 1    | 0.92 | 0.35                          | 0.44 | 0.52 | 0.56 | 0.49 | 0.23            | 0.31 | 0.36 | 0.42 | 0.36  | -0.14          | -0.16 | -0.17 | -0.17 | -0.15 |      |
|                               | 7                 |      |      |      |      |      |      |      | 1    | 0.29                          | 0.37 | 0.45 | 0.51 | 0.53 | 0.19            | 0.25 | 0.29 | 0.34 | 0.37  | -0.13          | -0.15 | -0.15 | -0.15 | -0.15 |      |
| SO <sub>4</sub> <sup>2-</sup> | 1                 |      |      |      |      |      |      |      |      | 1                             | 0.84 | 0.70 | 0.57 | 0.51 | 0.32            | 0.34 | 0.31 | 0.24 | 0.20  | 0.12           | 0.10  | 0.09  | 0.09  | 0.11  |      |
|                               | 2                 |      |      |      |      |      |      |      |      |                               | 1    | 0.89 | 0.72 | 0.63 | 0.20            | 0.28 | 0.29 | 0.23 | 0.18  | 0.13           | 0.14  | 0.12  | 0.12  | 0.13  |      |
|                               | 3                 |      |      |      |      |      |      |      |      |                               |      | 1    | 0.86 | 0.75 | 0.15            | 0.21 | 0.26 | 0.24 | 0.19  | 0.13           | 0.15  | 0.16  | 0.15  | 0.15  |      |
|                               | 5                 |      |      |      |      |      |      |      |      |                               |      |      | 1    | 0.90 | 0.09            | 0.13 | 0.16 | 0.21 | 0.20  | 0.13           | 0.15  | 0.16  | 0.17  | 0.17  |      |
|                               | 7                 |      |      |      |      |      |      |      |      |                               |      |      |      | 1    | 0.05            | 0.07 | 0.09 | 0.13 | 0.16  | 0.16           | 0.18  | 0.20  | 0.20  | 0.22  |      |
| NO <sub>x</sub>               | 1                 |      |      |      |      |      |      |      |      |                               |      |      |      |      | 1               | 0.88 | 0.77 | 0.68 | 0.65  | -0.54          | -0.49 | -0.44 | -0.40 | -0.39 |      |
|                               | 2                 |      |      |      |      |      |      |      |      |                               |      |      |      |      |                 | 1    | 0.93 | 0.80 | 0.76  | -0.44          | -0.53 | -0.51 | -0.45 | -0.45 |      |
|                               | 3                 |      |      |      |      |      |      |      |      |                               |      |      |      |      |                 |      | 1    | 0.89 | 0.84  | -0.40          | -0.48 | -0.53 | -0.49 | -0.49 |      |
|                               | 5                 |      |      |      |      |      |      |      |      |                               |      |      |      |      |                 |      |      | 1    | 0.951 | -0.39          | -0.45 | -0.50 | -0.54 | -0.54 |      |
|                               | 7                 |      |      |      |      |      |      |      |      |                               |      |      |      |      |                 |      |      |      | 1     | -0.38          | -0.43 | -0.48 | -0.51 | -0.55 |      |
| O <sub>3</sub>                | 1                 |      |      |      |      |      |      |      |      |                               |      |      |      |      |                 |      |      |      |       | 1              | 0.89  | 0.81  | 0.75  | 0.72  |      |
|                               | 2                 |      |      |      |      |      |      |      |      |                               |      |      |      |      |                 |      |      |      |       |                | 1     | 0.94  | 0.86  | 0.82  |      |
|                               | 3                 |      |      |      |      |      |      |      |      |                               |      |      |      |      |                 |      |      |      |       |                |       | 1     | 0.93  | 0.89  |      |
|                               | 5                 |      |      |      |      |      |      |      |      |                               |      |      |      |      |                 |      |      |      |       |                |       |       | 1     | 0.97  |      |
|                               | 7                 |      |      |      |      |      |      |      |      |                               |      |      |      |      |                 |      |      |      |       |                |       |       |       | 1     |      |

Abbreviation: PM<sub>2.5</sub>, fine particulate matter; BC, black carbon; SO<sub>4</sub><sup>2-</sup>, sulfate; NO<sub>x</sub>, nitrogen oxides; O<sub>3</sub>, ozone.

**Supplemental Figure I.** Histograms of the 1-day moving average of: (A) fine particulate matter (PM<sub>2.5</sub>), (B) black carbon (BC), (C) sulfate (SO<sub>4</sub><sup>2-</sup>), (D) nitrogen oxides (NO<sub>x</sub>), and (E) ozone (O<sub>3</sub>) among participants from the Framingham Offspring cohort examination 7 (1998-2001), examination 8 (2005-2008), Third Generation cohort examination 1 (2002-2005), and examination 2 (2008-2011).

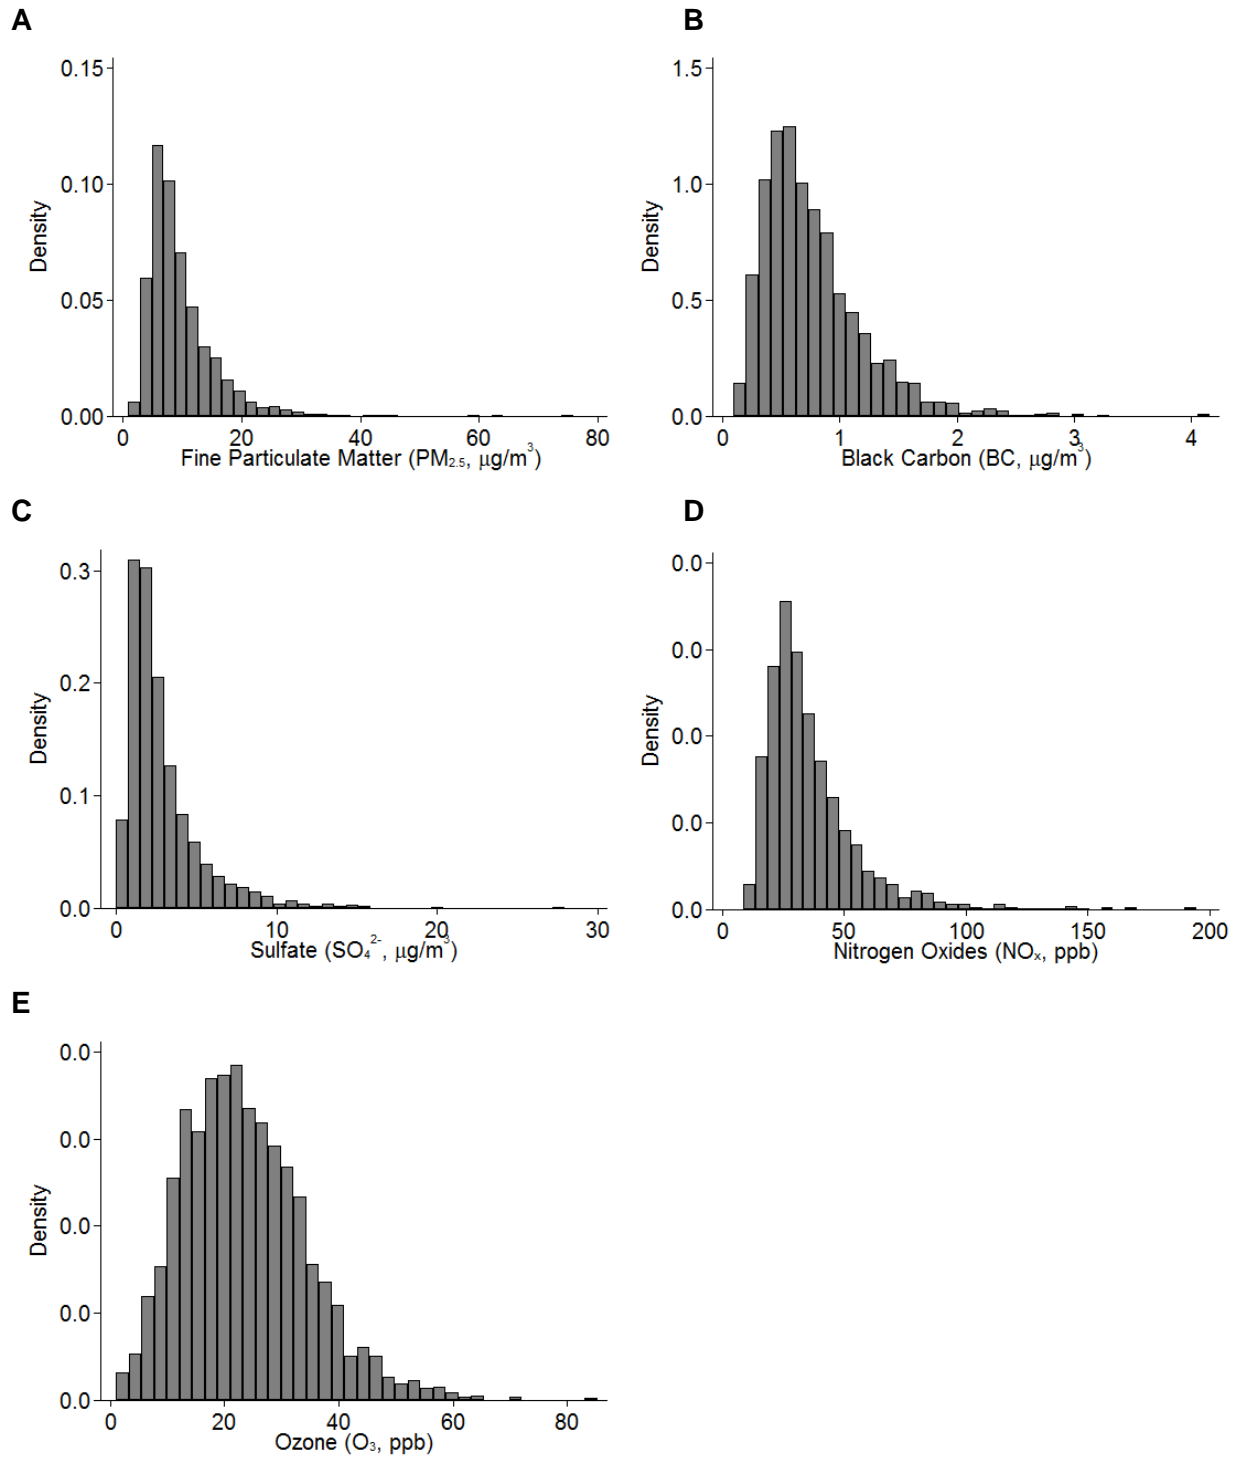

**Supplemental Figure II.** Histograms of: A)  $\log_e$  C-reactive protein (CRP); B)  $\log_e$  interleukin-6; C)  $\log_e$  tumor necrosis factor receptor 2 (TNFR2); D)  $\log_e$  fibrinogen; and E)  $\log_e$  TNF $\alpha$  among participants from the Framingham Offspring cohort examination 7 (1998-2001), examination 8 (2005-2008), Third Generation cohort examination 1 (2002-2005), and examination 2 (2008-2011)

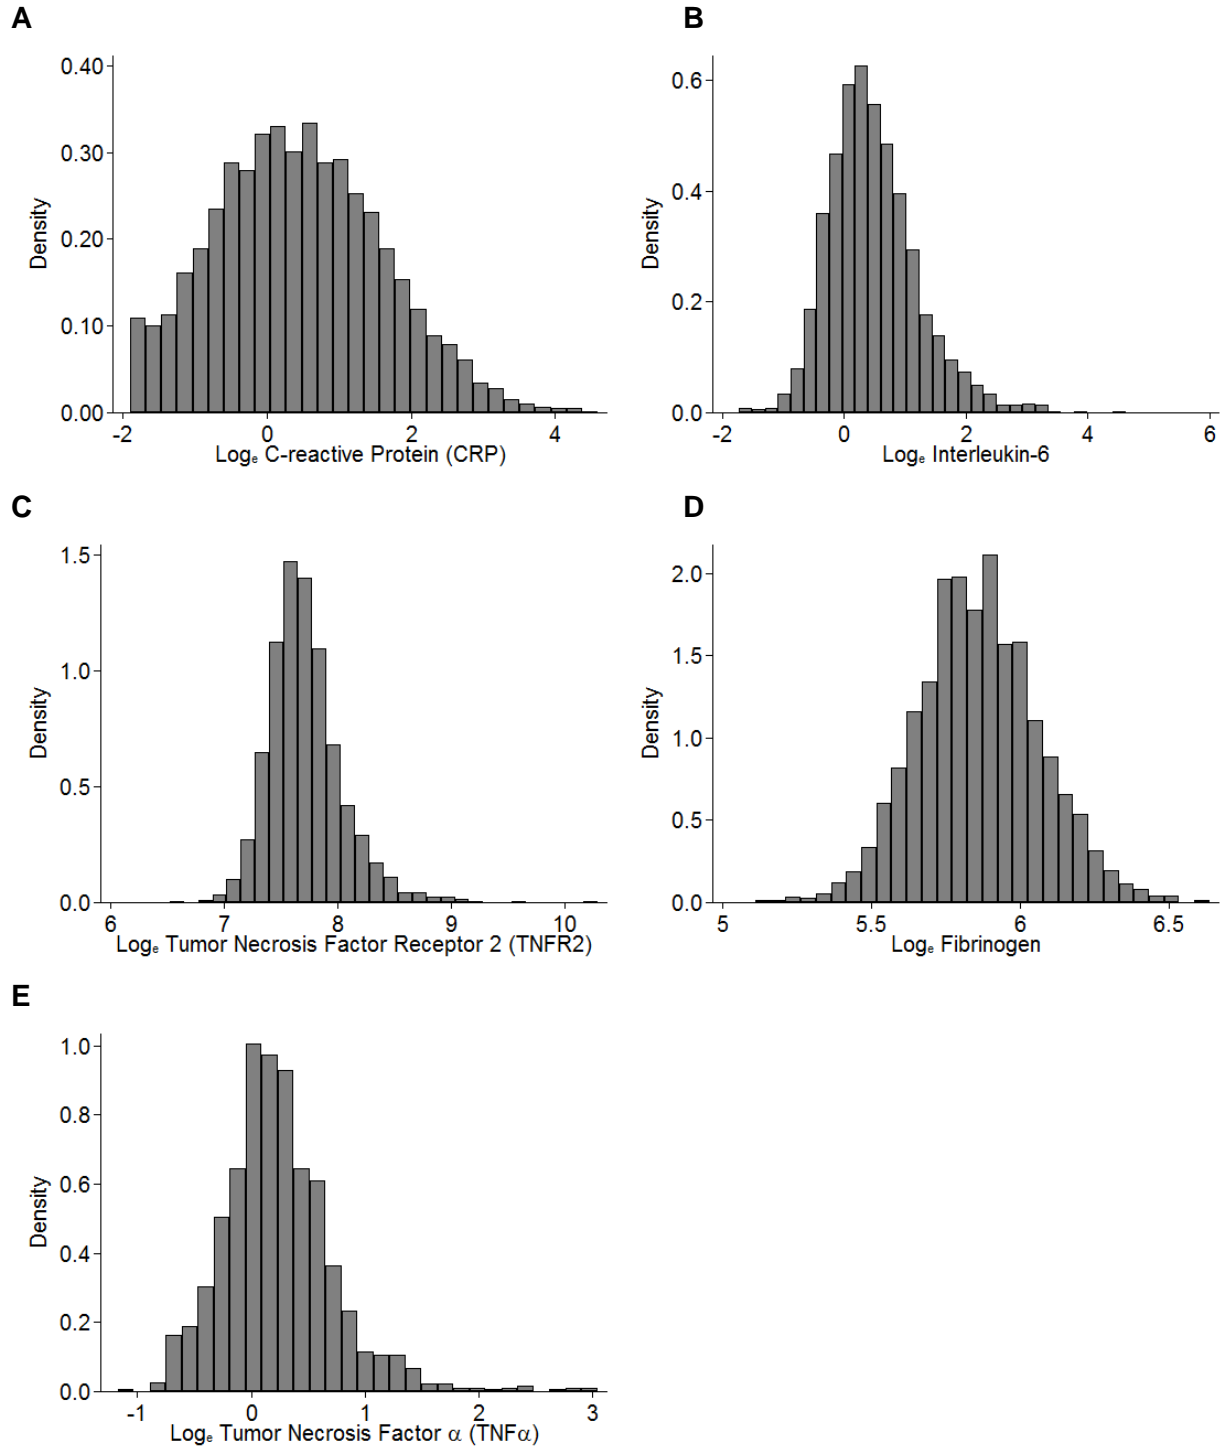

**Supplemental Figure III.** Associations of 1- to 7-day moving averages of air pollutants with A)  $\log_e$  C-reactive protein (CRP); B)  $\log_e$  Interleukin-6; C)  $\log_e$  tumor necrosis factor receptor 2 (TNFR2); D)  $\log_e$  fibrinogen; and E)  $\log_e$  TNF $\alpha$  among participants from the Framingham Offspring cohort examination 7 (1998-2001), examination 8 (2005-2008), Third Generation cohort examination 1 (2002-2005), and examination 2 (2008-2011). Models were adjusted for centered age, (centered age)<sup>2</sup>, sex, body mass index, smoking status, pack years, alcohol intake, educational attainment, census tract median household income, date of examination visit, sine and cosine season, day of week, temperature, and relative humidity. **We excluded observations with any one of the 7 days before exam that had PM<sub>2.5</sub>>35  $\mu\text{g}/\text{m}^3$ .** An exam identifier was added for CRP, interleukin-6, TNFR2, and fibrinogen. Results were scaled to 5  $\mu\text{g}/\text{m}^3$  for fine particulate matter (PM<sub>2.5</sub>), 0.5  $\mu\text{g}/\text{m}^3$  for black carbon (BC), 2  $\mu\text{g}/\text{m}^3$  for sulfate (SO<sub>4</sub><sup>2-</sup>), 20 ppb for nitrogen oxides (NO<sub>x</sub>), and 10 ppb for ozone (O<sub>3</sub>). Error bars indicate the 95% confidence intervals.

**A**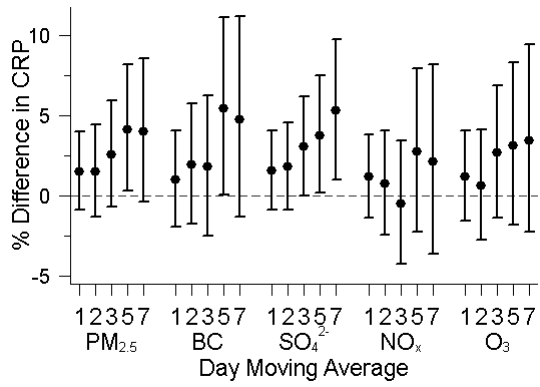**B**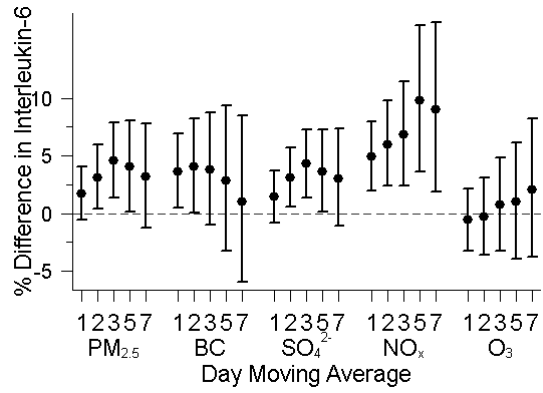**C**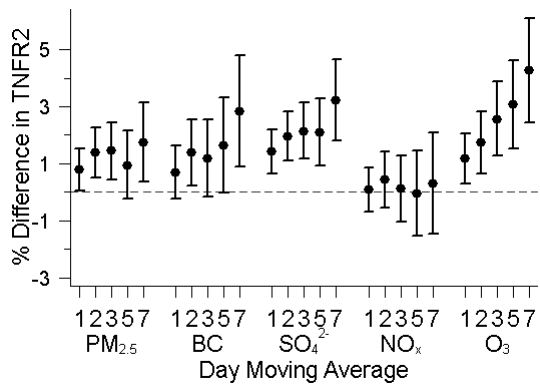**D**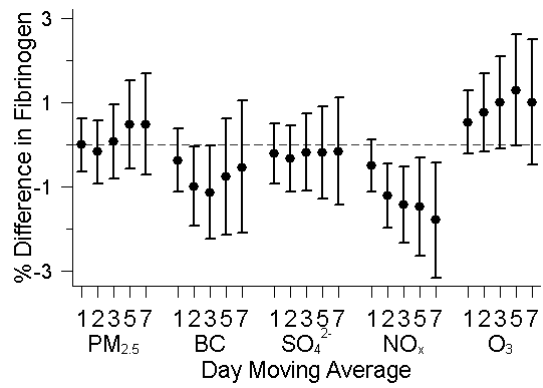**E**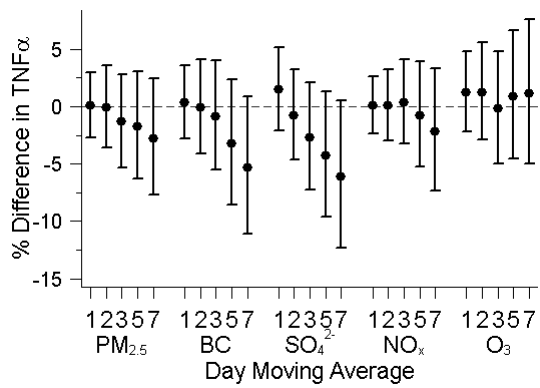

**Supplemental Figure IV.** Associations of 1- to 7-day moving averages of air pollutants with A)  $\log_e$  C-reactive protein (CRP); B)  $\log_e$  Interleukin-6; C)  $\log_e$  tumor necrosis factor receptor 2 (TNFR2); D)  $\log_e$  fibrinogen; and E)  $\log_e$  TNF $\alpha$  among participants from the Framingham Offspring cohort examination 7 (1998-2001), examination 8 (2005-2008), Third Generation cohort examination 1 (2002-2005), and examination 2 (2008-2011). Models were adjusted for centered age, (centered age)<sup>2</sup>, sex, body mass index, smoking status, pack years, alcohol intake, educational attainment, census tract median household income, date of examination visit, sine and cosine season, day of week, temperature, and relative humidity. **We included participants who were current smokers at the time of exam.** An exam identifier was added for CRP, interleukin-6, TNFR2, and fibrinogen. Results were scaled to 5  $\mu\text{g}/\text{m}^3$  for fine particulate matter (PM<sub>2.5</sub>), 0.5  $\mu\text{g}/\text{m}^3$  for black carbon (BC), 2  $\mu\text{g}/\text{m}^3$  for sulfate (SO<sub>4</sub><sup>2-</sup>), 20 ppb for nitrogen oxides (NO<sub>x</sub>), and 10 ppb for ozone (O<sub>3</sub>). Error bars indicate the 95% confidence intervals.



**A**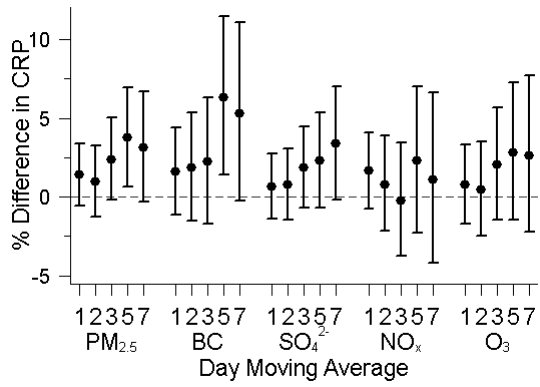**B**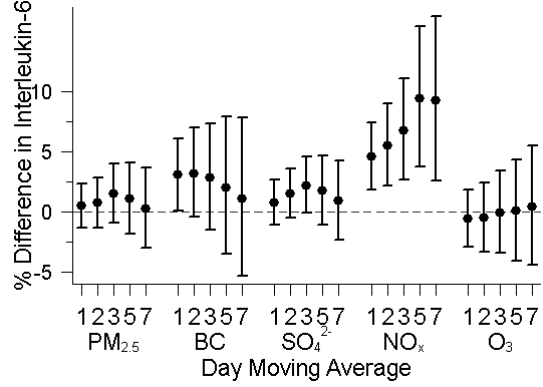**C**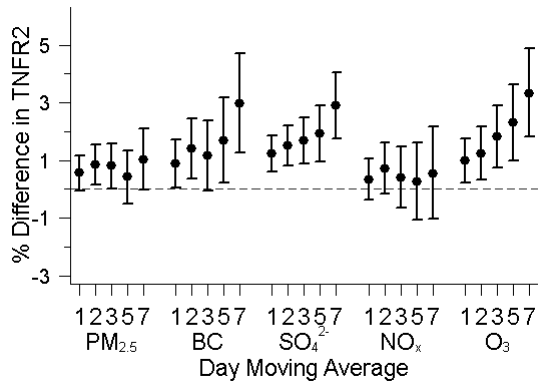**D**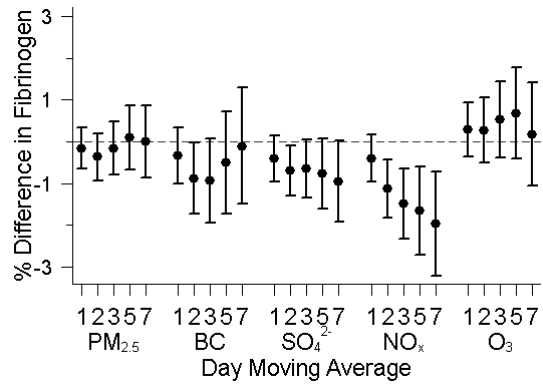**E**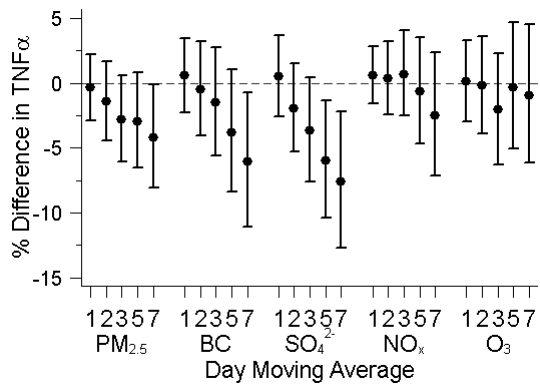

**Supplemental Figure V.** Associations of 1- to 7-day moving averages of air pollutants with A)  $\log_e$  C-reactive protein (CRP); B)  $\log_e$  Interleukin-6; C)  $\log_e$  tumor necrosis factor receptor 2 (TNFR2); D)  $\log_e$  fibrinogen; and E)  $\log_e$  TNF $\alpha$  among participants from the Framingham Offspring cohort examination 7 (1998-2001), examination 8 (2005-2008), Third Generation cohort examination 1 (2002-2005), and examination 2 (2008-2011). Models were adjusted for centered age, (centered age)<sup>2</sup>, sex, body mass index, smoking status, pack years, alcohol intake, educational attainment, census tract median household income, date of examination visit, sine and cosine season, day of week, temperature, and relative humidity. **We restricted to those who lived within 40 km from the central monitoring station.** An exam identifier was added for CRP, interleukin-6, TNFR2, and fibrinogen. Results were scaled to 5  $\mu\text{g}/\text{m}^3$  for fine particulate matter (PM<sub>2.5</sub>), 0.5  $\mu\text{g}/\text{m}^3$  for black carbon (BC), 2  $\mu\text{g}/\text{m}^3$  for sulfate (SO<sub>4</sub><sup>2-</sup>), 20 ppb for nitrogen oxides (NO<sub>x</sub>), and 10 ppb for ozone (O<sub>3</sub>). Error bars indicate the 95% confidence intervals.

**A**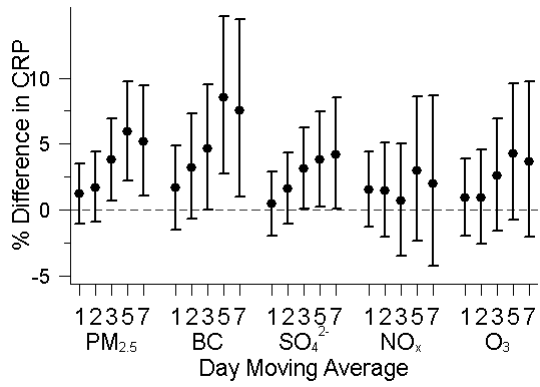**B**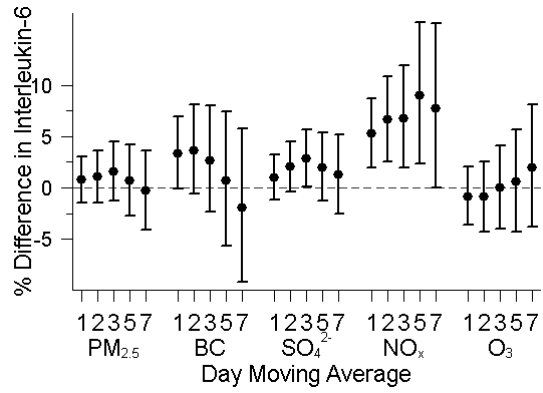**C**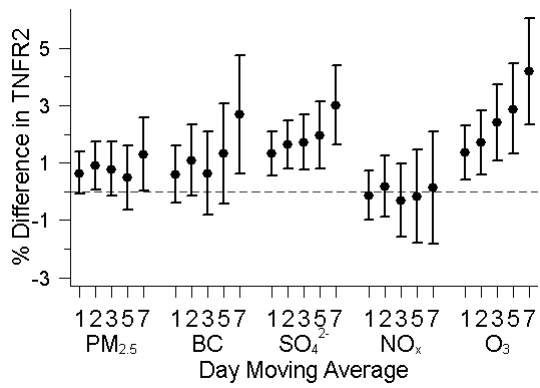**D**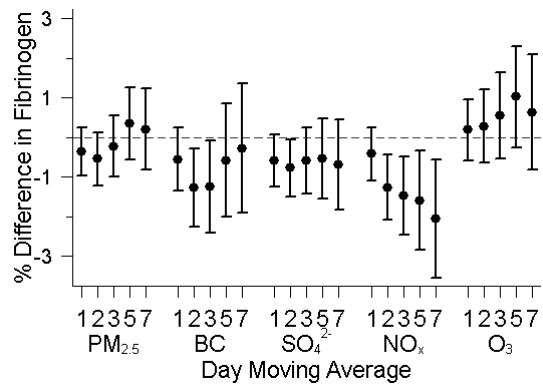**E**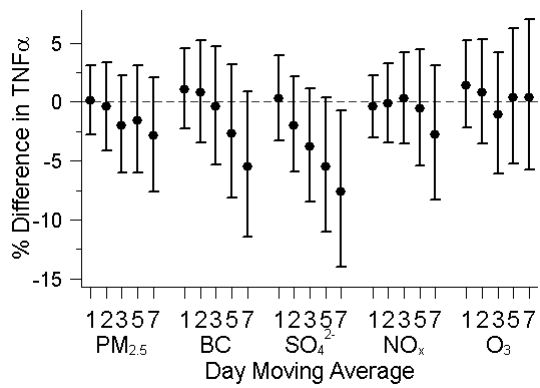

**Supplemental Figure VI.** Associations of 1- to 7-day moving averages of air pollutants with A)  $\log_e$  C-reactive protein (CRP); B)  $\log_e$  Interleukin-6; C)  $\log_e$  tumor necrosis factor receptor 2 (TNFR2); D)  $\log_e$  fibrinogen; and E)  $\log_e$  TNF $\alpha$  among participants from the Framingham Offspring cohort examination 7 (1998-2001), examination 8 (2005-2008), Third Generation cohort examination 1 (2002-2005), and examination 2 (2008-2011). Models were adjusted for centered age, (centered age)<sup>2</sup>, sex, body mass index, smoking status, pack years, alcohol intake, educational attainment, census tract median household income, date of examination visit, sine and cosine season, day of week, temperature, and relative humidity. **We restricted the analyses of each pollutant to participants who had complete data for all moving averages.** An exam identifier was added for CRP, interleukin-6, TNFR2, and fibrinogen. Results were scaled to 5  $\mu\text{g}/\text{m}^3$  for fine particulate matter (PM<sub>2.5</sub>), 0.5  $\mu\text{g}/\text{m}^3$  for black carbon (BC), 2  $\mu\text{g}/\text{m}^3$  for sulfate (SO<sub>4</sub><sup>2-</sup>), 20 ppb for nitrogen oxides (NO<sub>x</sub>), and 10 ppb for ozone (O<sub>3</sub>). Error bars indicate the 95% confidence intervals.

**A**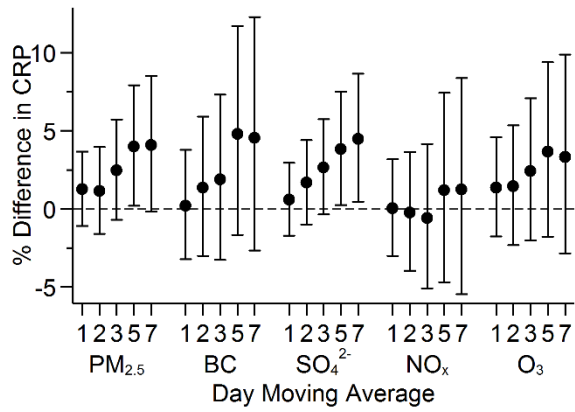**B**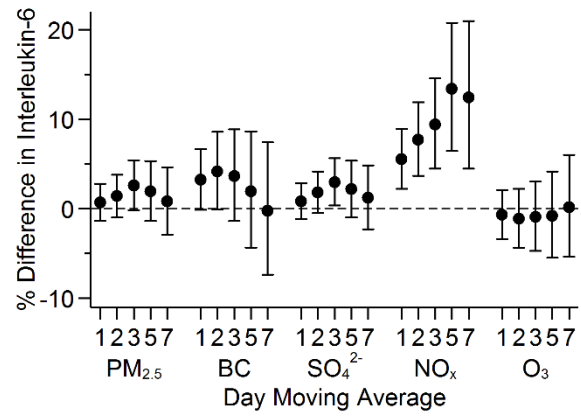**C**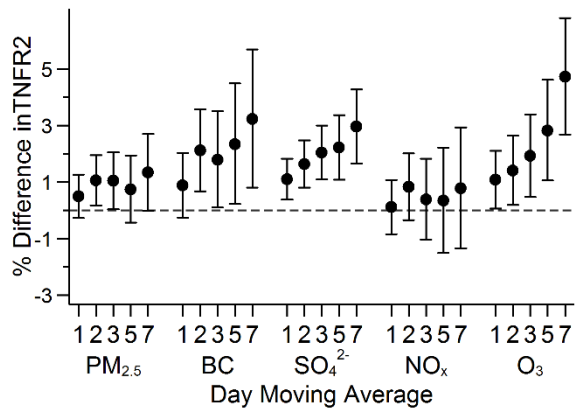**D**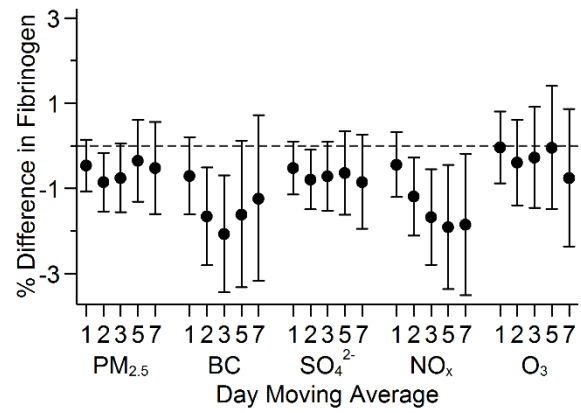**E**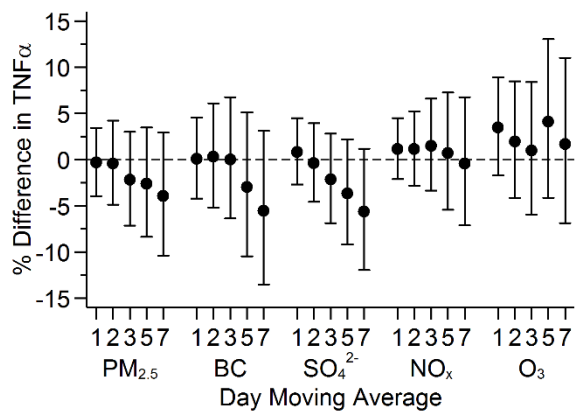

**Supplemental Figure VII.** Associations of 1- to 7-day moving averages of air pollutants with A)  $\log_e$  C-reactive protein (CRP); B)  $\log_e$  Interleukin-6; C)  $\log_e$  tumor necrosis factor receptor 2 (TNFR2); D)  $\log_e$  fibrinogen; and E)  $\log_e$  TNF $\alpha$  among participants from the Framingham Offspring cohort examination 7 (1998-2001), examination 8 (2005-2008), Third Generation cohort examination 1 (2002-2005), and examination 2 (2008-2011). Models were adjusted for centered age, (centered age)<sup>2</sup>, sex, body mass index, smoking status, pack years, alcohol intake, educational attainment, census tract median household income, date of examination visit, sine and cosine season, day of week, temperature, relative humidity, **physical activity, usual occupation, census tract median value of owner occupied housing units, census tract population density, cardiovascular disease status, antihypertensives use, and statin use**. An exam identifier was added for CRP, interleukin-6, TNFR2, and fibrinogen. Results were scaled to 5  $\mu\text{g}/\text{m}^3$  for fine particulate matter (PM<sub>2.5</sub>), 0.5  $\mu\text{g}/\text{m}^3$  for black carbon (BC), 2  $\mu\text{g}/\text{m}^3$  for sulfate (SO<sub>4</sub><sup>2-</sup>), 20 ppb for nitrogen oxides (NO<sub>x</sub>), and 10 ppb for ozone (O<sub>3</sub>). Error bars indicate the 95% confidence intervals.

**A**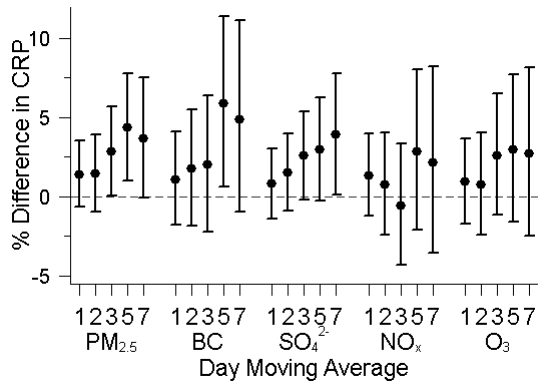**B**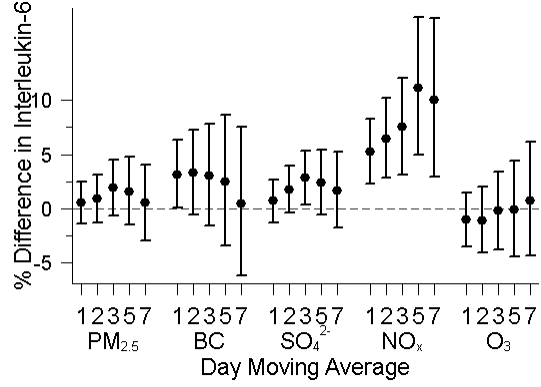**C**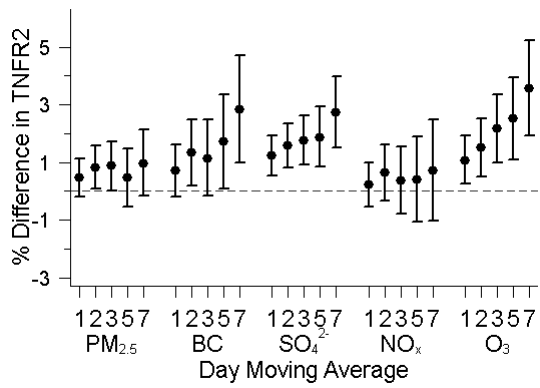**D**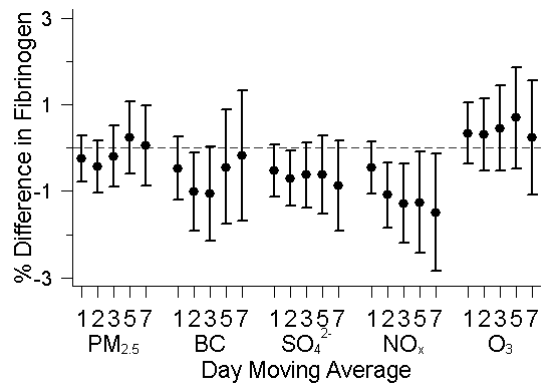**E**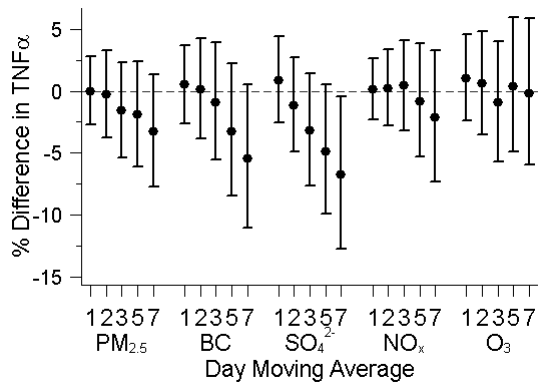

**Supplemental Figure VIII.** Associations of 1- to 7-day moving averages of air pollutants with A)  $\log_e$  C-reactive protein (CRP); B)  $\log_e$  Interleukin-6; C)  $\log_e$  tumor necrosis factor receptor 2 (TNFR2); D)  $\log_e$  fibrinogen; and E)  $\log_e$  TNF $\alpha$  **stratified by median age** among participants from the Framingham Offspring cohort examination 7 (1998-2001), examination 8 (2005-2008), Third Generation cohort examination 1 (2002-2005), and examination 2 (2008-2011). Models were adjusted for centered age, (centered age)<sup>2</sup>, sex, body mass index, smoking status, pack years, alcohol intake, educational attainment, census tract median household income, date of examination visit, sine and cosine season, day of week, temperature, and relative humidity. An exam identifier was added for CRP, interleukin-6, TNFR2, and fibrinogen. Results were scaled to 5  $\mu\text{g}/\text{m}^3$  for fine particulate matter (PM<sub>2.5</sub>), 0.5  $\mu\text{g}/\text{m}^3$  for black carbon (BC), 2  $\mu\text{g}/\text{m}^3$  for sulfate (SO<sub>4</sub><sup>2-</sup>), 20 ppb for nitrogen oxides (NO<sub>x</sub>), and 10 ppb for ozone (O<sub>3</sub>). Error bars indicate the 95% confidence intervals. Gray circle:  $\leq 53$  years old. Black triangle:  $> 53$  years old.



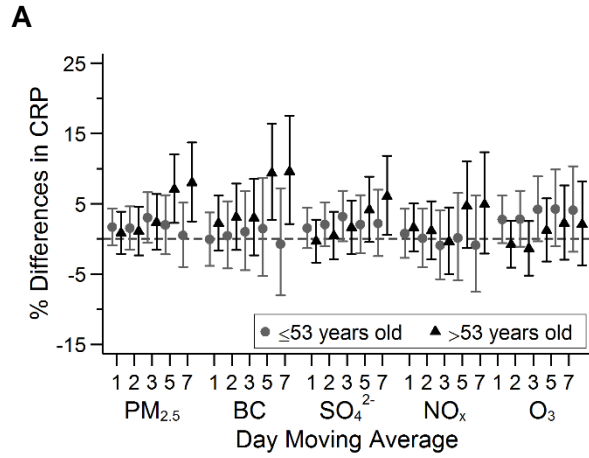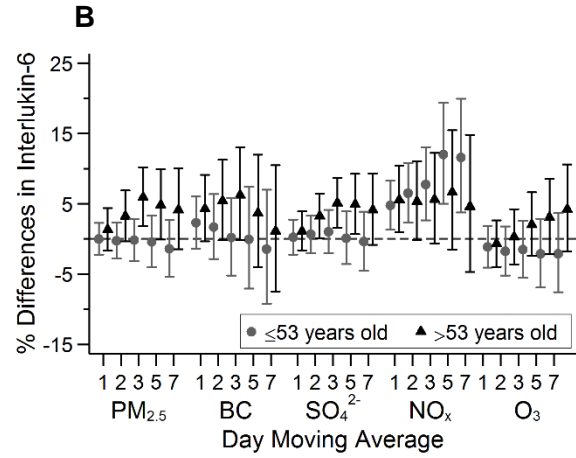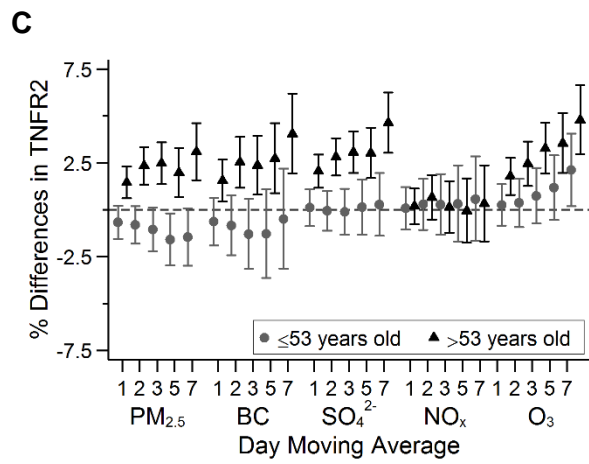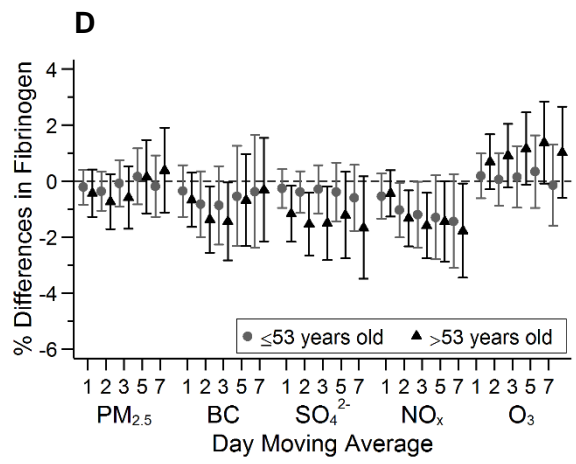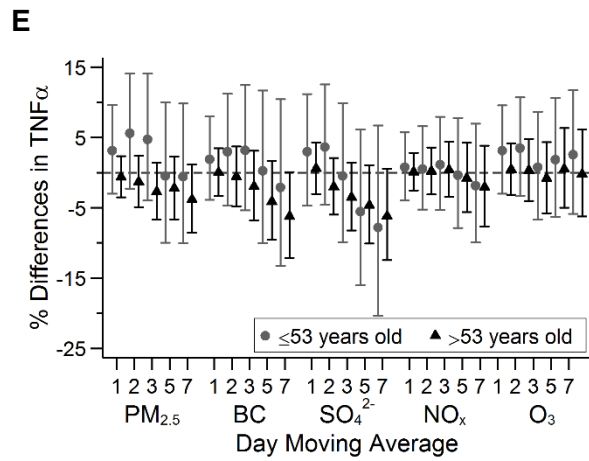

**Supplemental Figure IX.** Associations of 1- to 7-day moving averages of air pollutants with A)  $\log_e$  C-reactive protein (CRP); B)  $\log_e$  Interleukin-6; C)  $\log_e$  tumor necrosis factor receptor 2 (TNFR2); D)  $\log_e$  fibrinogen; and E)  $\log_e$  TNF $\alpha$  **stratified by sex** among participants from the Framingham Offspring cohort examination 7 (1998-2001), examination 8 (2005-2008), Third Generation cohort examination 1 (2002-2005), and examination 2 (2008-2011). Models were adjusted for centered age, (centered age)<sup>2</sup>, sex, body mass index, smoking status, pack years, alcohol intake, educational attainment, census tract median household income, date of examination visit, sine and cosine season, day of week, temperature, and relative humidity. An exam identifier was added for CRP, interleukin-6, TNFR2, and fibrinogen. Results were scaled to 5  $\mu\text{g}/\text{m}^3$  for fine particulate matter (PM<sub>2.5</sub>), 0.5  $\mu\text{g}/\text{m}^3$  for black carbon (BC), 2  $\mu\text{g}/\text{m}^3$  for sulfate (SO<sub>4</sub><sup>2-</sup>), 20 ppb for nitrogen oxides (NO<sub>x</sub>), and 10 ppb for ozone (O<sub>3</sub>). Error bars indicate the 95% confidence intervals. Gray circle: women. Black triangle: men.

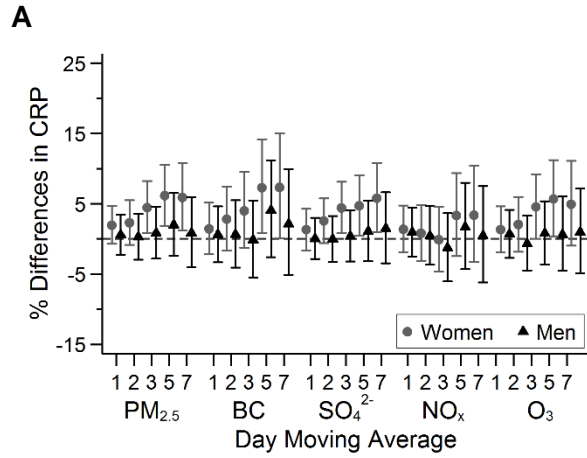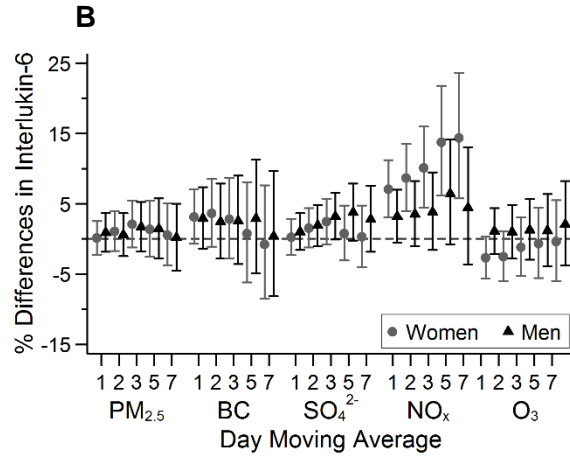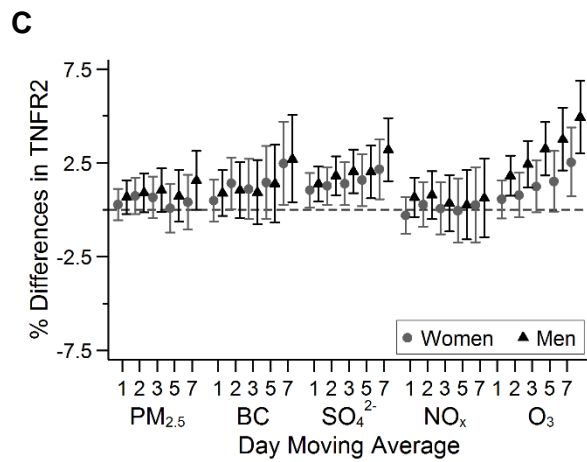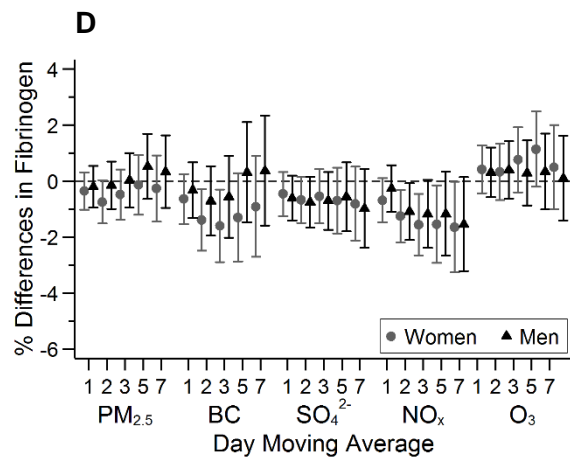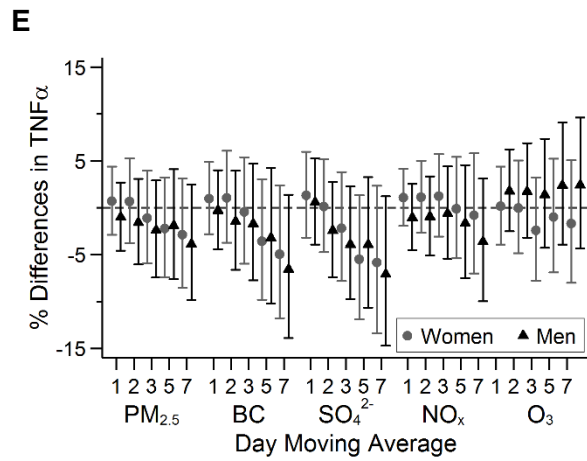

**Supplemental Figure X.** Associations of 1- to 7-day moving averages of air pollutants with A)  $\log_e$  C-reactive protein (CRP); B)  $\log_e$  Interleukin-6; C)  $\log_e$  tumor necrosis factor receptor 2 (TNFR2); D)  $\log_e$  fibrinogen; and E)  $\log_e$  TNF $\alpha$  **stratified by educational attainment** among participants from the Framingham Offspring cohort examination 7 (1998-2001), examination 8 (2005-2008), Third Generation cohort examination 1 (2002-2005), and examination 2 (2008-2011). Models were adjusted for centered age, (centered age)<sup>2</sup>, sex, body mass index, smoking status, pack years, alcohol intake, census tract median household income, date of examination visit, sine and cosine season, day of week, temperature, and relative humidity. An exam identifier was added for CRP, interleukin-6, TNFR2, and fibrinogen. Results were scaled to 5  $\mu\text{g}/\text{m}^3$  for fine particulate matter (PM<sub>2.5</sub>), 0.5  $\mu\text{g}/\text{m}^3$  for black carbon (BC), 2  $\mu\text{g}/\text{m}^3$  for sulfate (SO<sub>4</sub><sup>2-</sup>), 20 ppb for nitrogen oxides (NO<sub>x</sub>), and 10 ppb for ozone (O<sub>3</sub>). Error bars indicate the 95% confidence intervals. Gray circle: high school or less. Black triangle: college or higher.

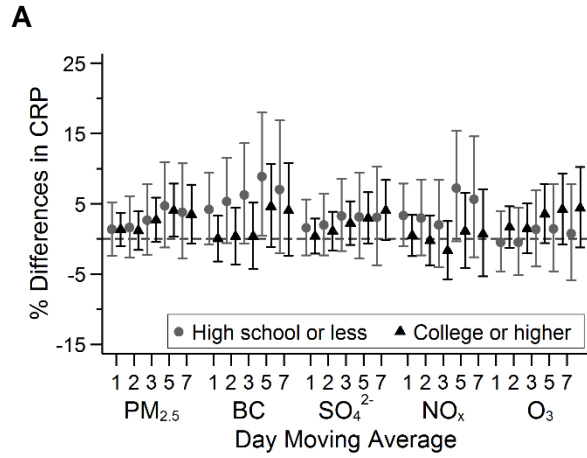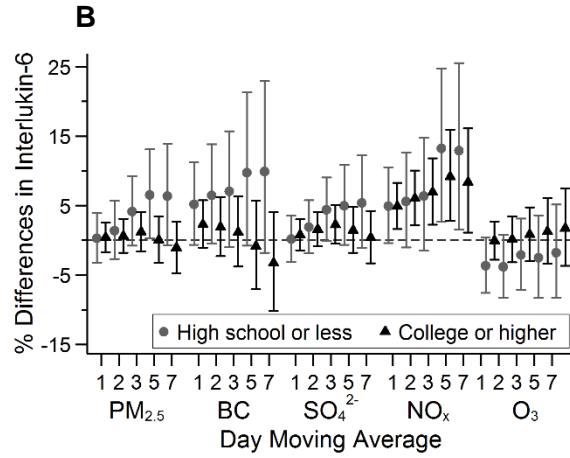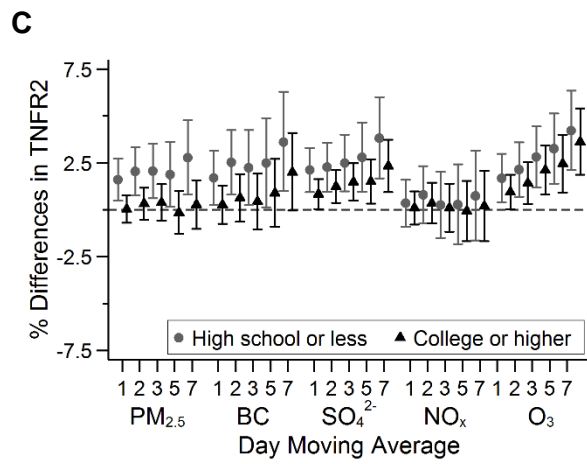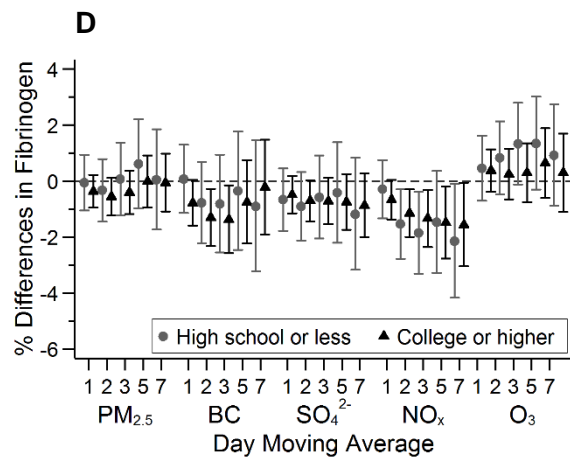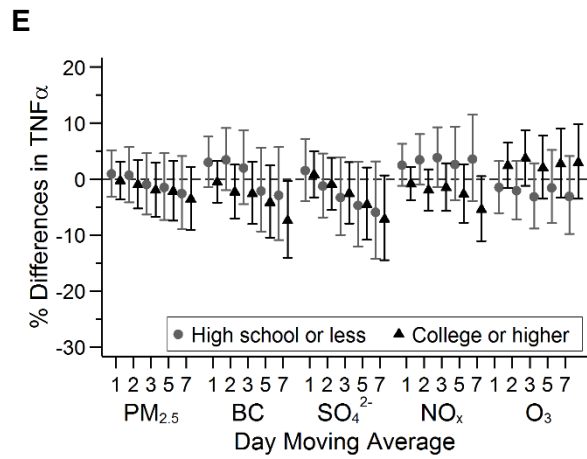

**Supplemental Figure XI.** Associations of 1- to 7-day moving averages of air pollutants with A)  $\log_e$  C-reactive protein (CRP); B)  $\log_e$  Interleukin-6; C)  $\log_e$  tumor necrosis factor receptor 2 (TNFR2); D)  $\log_e$  fibrinogen; and E)  $\log_e$  TNF $\alpha$  **stratified by diabetes status** among participants from the Framingham Offspring cohort examination 7 (1998-2001), examination 8 (2005-2008), Third Generation cohort examination 1 (2002-2005), and examination 2 (2008-2011). Models were adjusted for centered age, (centered age)<sup>2</sup>, sex, body mass index, smoking status, pack years, alcohol intake, educational attainment, census tract median household income, date of examination visit, sine and cosine season, day of week, temperature, and relative humidity. An exam identifier was added for CRP, interleukin-6, TNFR2, and fibrinogen. Results were scaled to 5  $\mu\text{g}/\text{m}^3$  for fine particulate matter (PM<sub>2.5</sub>), 0.5  $\mu\text{g}/\text{m}^3$  for black carbon (BC), 2  $\mu\text{g}/\text{m}^3$  for sulfate (SO<sub>4</sub><sup>2-</sup>), 20 ppb for nitrogen oxides (NO<sub>x</sub>), and 10 ppb for ozone (O<sub>3</sub>). Error bars indicate the 95% confidence intervals. Gray circle: participants who did not have diabetes. Black triangle: participants who had diabetes.

**A**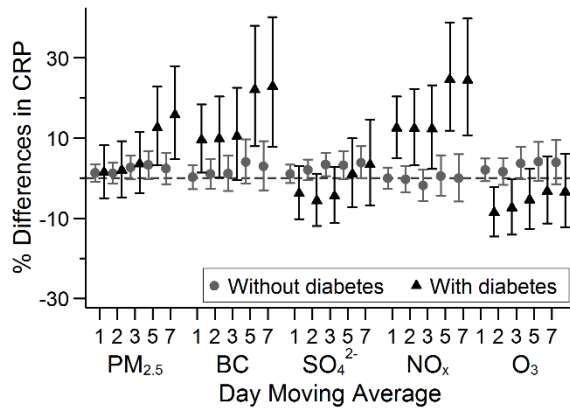**B**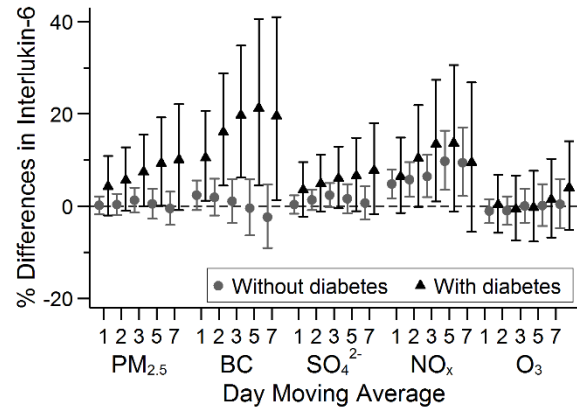**C**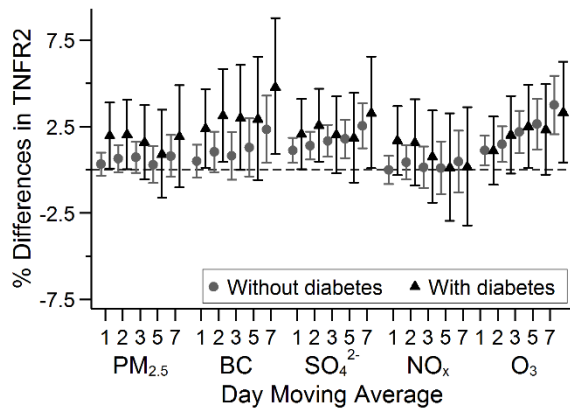**D**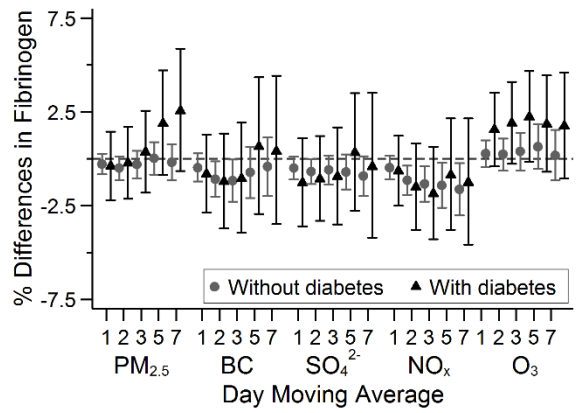**E**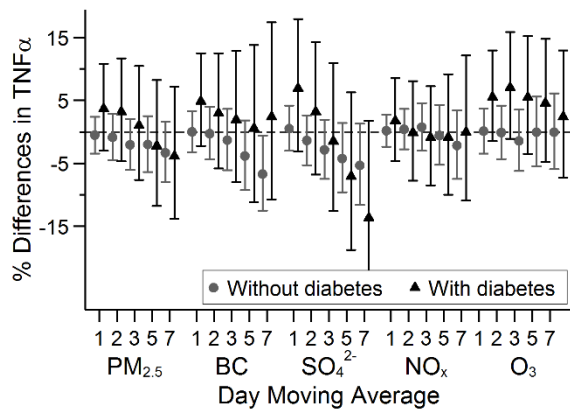

**Supplemental Figure XII.** Associations of 1- to 7-day moving averages of air pollutants with A)  $\log_e$  C-reactive protein (CRP); B)  $\log_e$  Interleukin-6; C)  $\log_e$  tumor necrosis factor receptor 2 (TNFR2); D)  $\log_e$  fibrinogen; and E)  $\log_e$  TNF $\alpha$  **stratified by cardiovascular disease (CVD) status** among participants from the Framingham Offspring cohort examination 7 (1998-2001), examination 8 (2005-2008), Third Generation cohort examination 1 (2002-2005), and examination 2 (2008-2011). Models were adjusted for centered age, (centered age)<sup>2</sup>, sex, body mass index, smoking status, pack years, alcohol intake, educational attainment, census tract median household income, date of examination visit, sine and cosine season, day of week, temperature, and relative humidity. An exam identifier was added for CRP, interleukin-6, TNFR2, and fibrinogen. Results were scaled to 5  $\mu\text{g}/\text{m}^3$  for fine particulate matter (PM<sub>2.5</sub>), 0.5  $\mu\text{g}/\text{m}^3$  for black carbon (BC), 2  $\mu\text{g}/\text{m}^3$  for sulfate (SO<sub>4</sub><sup>2-</sup>), 20 ppb for nitrogen oxides (NO<sub>x</sub>), and 10 ppb for ozone (O<sub>3</sub>). Error bars indicate the 95% confidence intervals. Gray circle: participants who did not have cardiovascular disease. Black triangle: participants who had cardiovascular disease.



**A**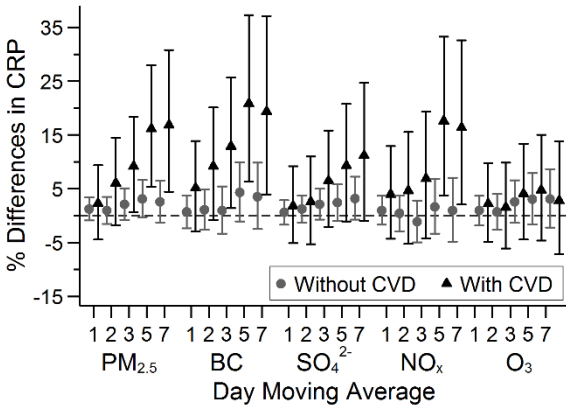**B**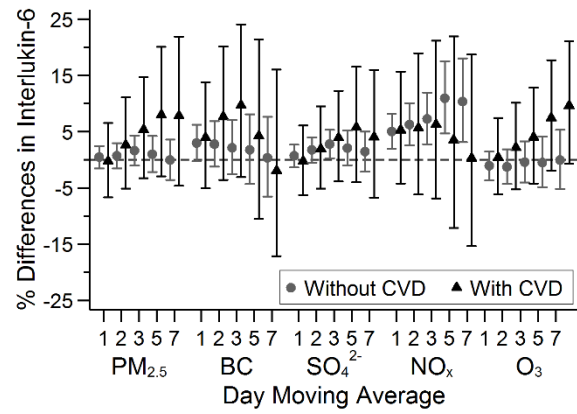**C**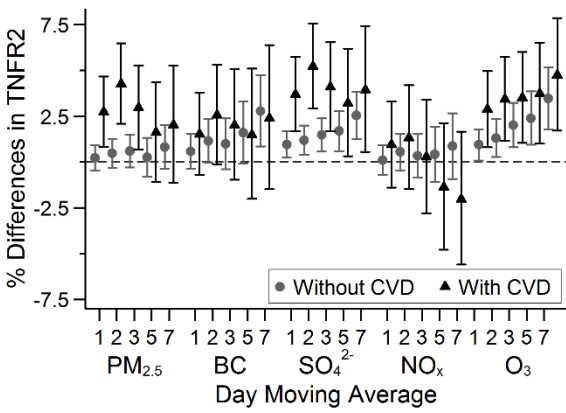**D**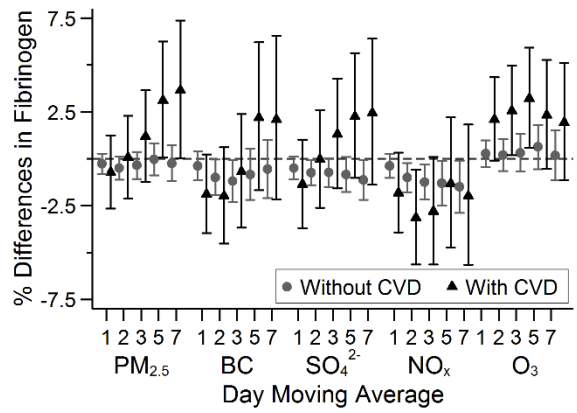**E**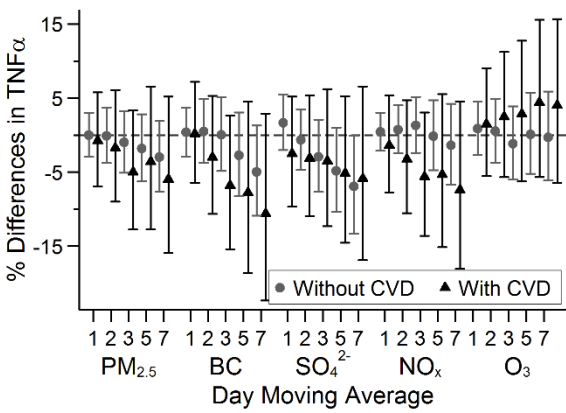

**Supplemental Figure XIII.** Associations of 1- to 7-day moving averages of air pollutants with A)  $\log_e$  C-reactive protein (CRP); B)  $\log_e$  Interleukin-6; C)  $\log_e$  tumor necrosis factor receptor 2 (TNFR2); D)  $\log_e$  fibrinogen; and E)  $\log_e$  TNF $\alpha$  **stratified by statins use** among participants from the Framingham Offspring cohort examination 7 (1998-2001), examination 8 (2005-2008), Third Generation cohort examination 1 (2002-2005), and examination 2 (2008-2011). Models were adjusted for centered age, (centered age)<sup>2</sup>, sex, body mass index, smoking status, pack years, alcohol intake, educational attainment, census tract median household income, date of examination visit, sine and cosine season, day of week, temperature, and relative humidity. An exam identifier was added for CRP, interleukin-6, TNFR2, and fibrinogen. Results were scaled to 5  $\mu\text{g}/\text{m}^3$  for fine particulate matter (PM<sub>2.5</sub>), 0.5  $\mu\text{g}/\text{m}^3$  for black carbon (BC), 2  $\mu\text{g}/\text{m}^3$  for sulfate (SO<sub>4</sub><sup>2-</sup>), 20 ppb for nitrogen oxides (NO<sub>x</sub>), and 10 ppb for ozone (O<sub>3</sub>). Error bars indicate the 95% confidence intervals. Gray circle: participants who did not report statins use. Black triangle: participants who reported statins use.

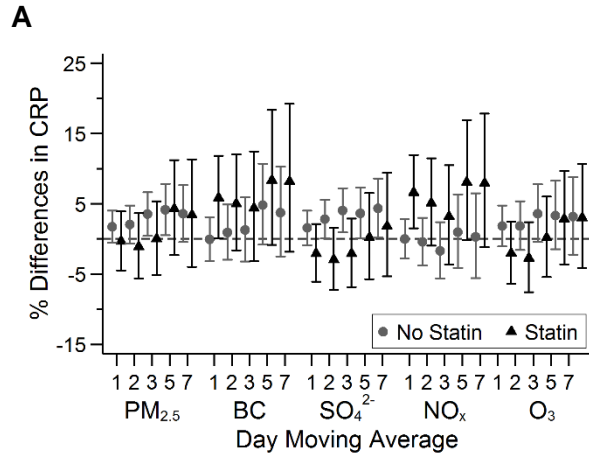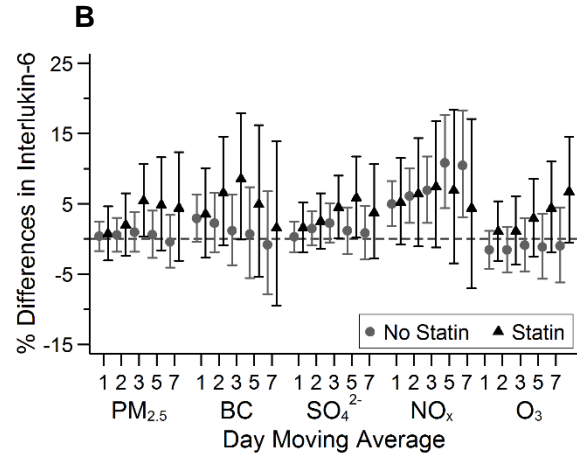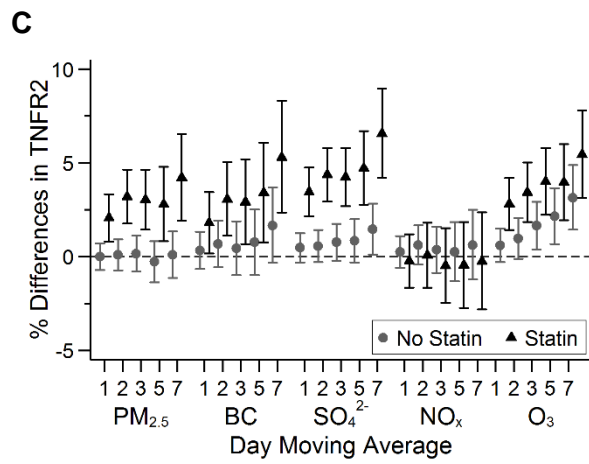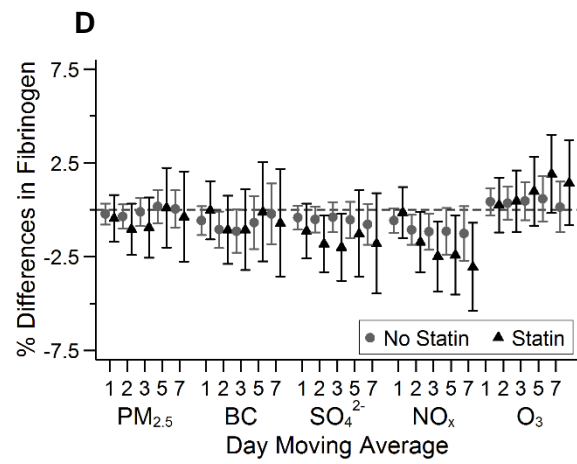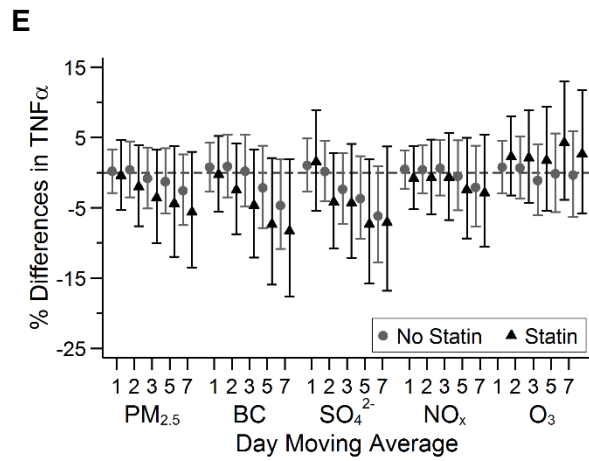

**Supplemental Figure XIV.** Associations of 1- to 7-day moving averages of air pollutants with A)  $\log_e$  C-reactive protein (CRP); B)  $\log_e$  Interleukin-6; C)  $\log_e$  tumor necrosis factor receptor 2 (TNFR2); D)  $\log_e$  fibrinogen; and E)  $\log_e$  TNF $\alpha$  **stratified by antihypertensives (HRX) use** among participants from the Framingham Offspring cohort examination 7 (1998-2001), examination 8 (2005-2008), Third Generation cohort examination 1 (2002-2005), and examination 2 (2008-2011). Models were adjusted for centered age, (centered age)<sup>2</sup>, sex, body mass index, smoking status, pack years, alcohol intake, educational attainment, census tract median household income, date of examination visit, sine and cosine season, day of week, temperature, and relative humidity. An exam identifier was added for CRP, interleukin-6, TNFR2, and fibrinogen. Results were scaled to 5  $\mu\text{g}/\text{m}^3$  for fine particulate matter (PM<sub>2.5</sub>), 0.5  $\mu\text{g}/\text{m}^3$  for black carbon (BC), 2  $\mu\text{g}/\text{m}^3$  for sulfate (SO<sub>4</sub><sup>2-</sup>), 20 ppb for nitrogen oxides (NO<sub>x</sub>), and 10 ppb for ozone (O<sub>3</sub>). Error bars indicate the 95% confidence intervals. Gray circle: participants who did not report using anti-hypertensives. Black triangle: participants who reported anti-hypertensives use.

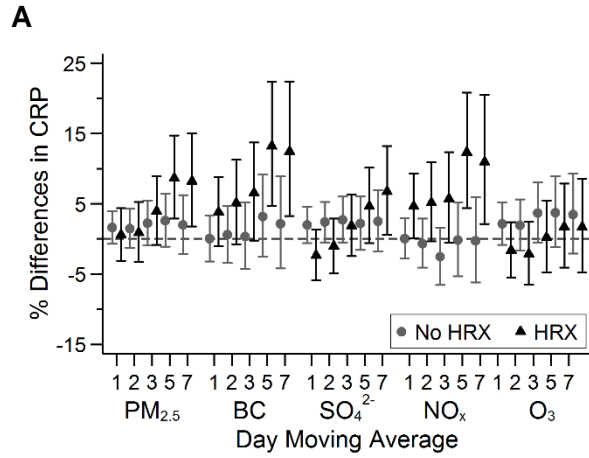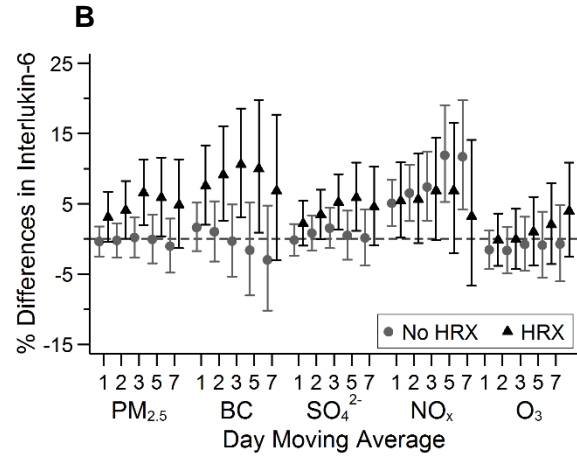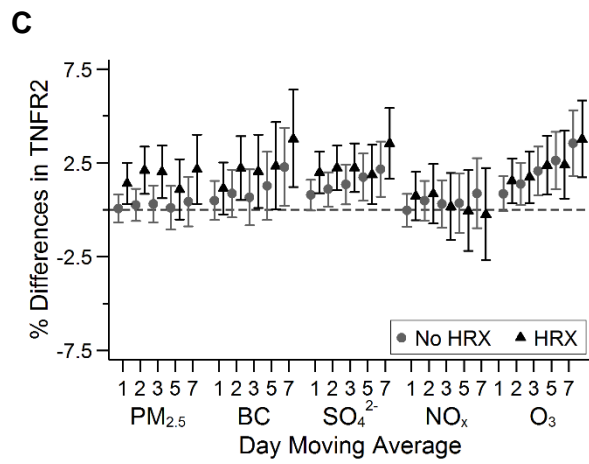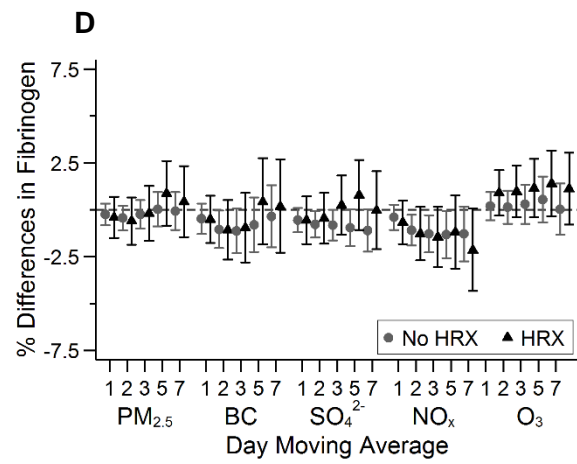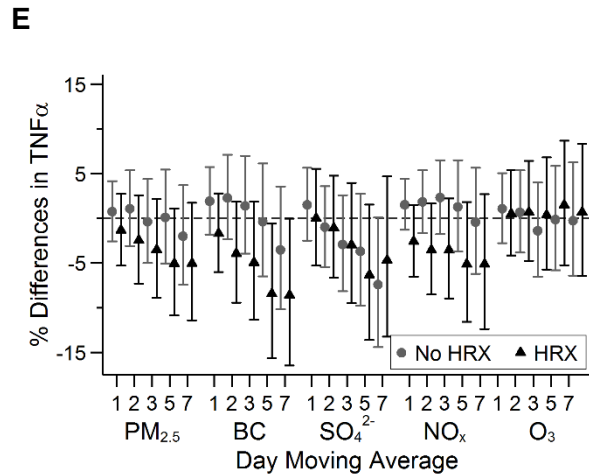

**Supplemental Figure XV.** Associations of 1- to 7-day moving averages of air pollutants with A)  $\log_e$  C-reactive protein (CRP); B)  $\log_e$  Interleukin-6; C)  $\log_e$  tumor necrosis factor receptor 2 (TNFR2); D)  $\log_e$  fibrinogen; and E)  $\log_e$  TNF $\alpha$  **stratified by season** among participants from the Framingham Offspring cohort examination 7 (1998-2001), examination 8 (2005-2008), Third Generation cohort examination 1 (2002-2005), and examination 2 (2008-2011). Models were adjusted for centered age, (centered age)<sup>2</sup>, sex, body mass index, smoking status, pack years, alcohol intake, educational attainment, census tract median household income, date of examination visit, sine and cosine season, day of week, temperature, and relative humidity. An exam identifier was added for CRP, interleukin-6, TNFR2, and fibrinogen. Results were scaled to 5  $\mu\text{g}/\text{m}^3$  for fine particulate matter (PM<sub>2.5</sub>), 0.5  $\mu\text{g}/\text{m}^3$  for black carbon (BC), 2  $\mu\text{g}/\text{m}^3$  for sulfate (SO<sub>4</sub><sup>2-</sup>), 20 ppb for nitrogen oxides (NO<sub>x</sub>), and 10 ppb for ozone (O<sub>3</sub>). Error bars indicate the 95% confidence intervals. Gray circle: participants who had their visits between October and March (Oct.-Mar.). Black triangle: participants who had their visits between April and September (Apr.-Sept.).

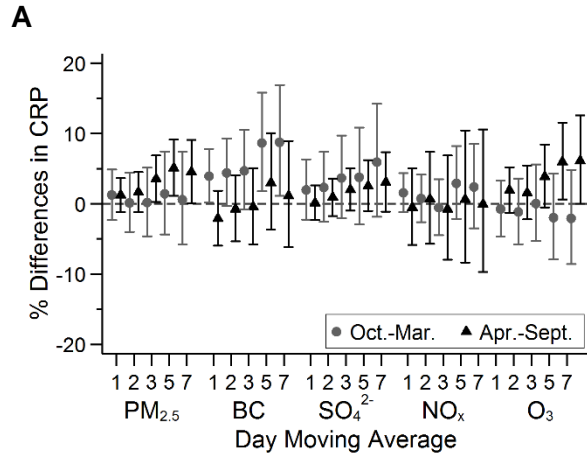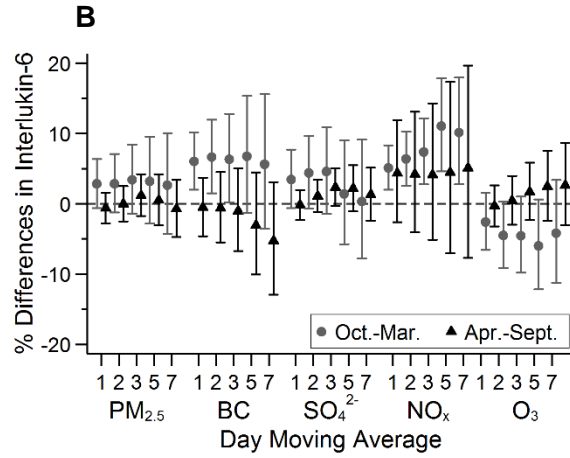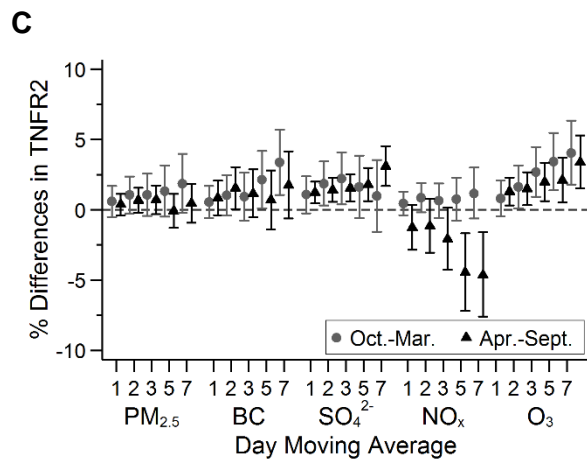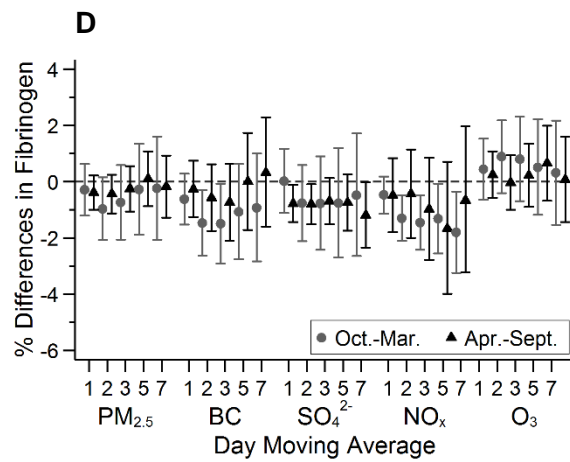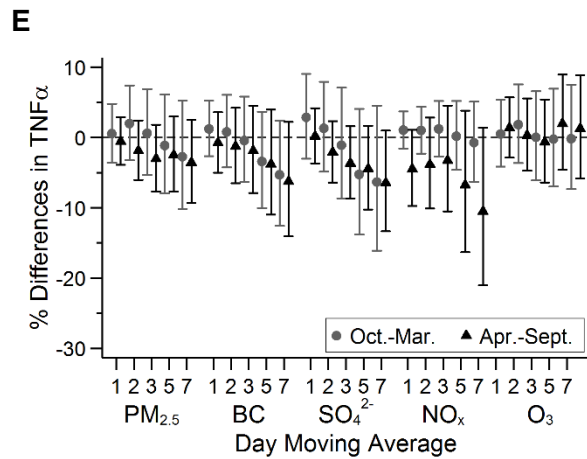

**Supplemental Figure XVI.** Associations of 1- to 7-day moving averages of air pollutants with A)  $\log_e$  C-reactive protein (CRP); B)  $\log_e$  Interleukin-6; C)  $\log_e$  tumor necrosis factor receptor 2 (TNFR2); and D)  $\log_e$  fibrinogen among participants from the Framingham **Offspring cohort** examination 7 (1998-2001) and/or examination 8 (2005-2008). Models were adjusted for centered age, (centered age)<sup>2</sup>, sex, body mass index, smoking status, pack years, alcohol intake, educational attainment, census tract median household income, date of examination visit, sine and cosine season, day of week, temperature, and relative humidity. An exam identifier was added for CRP. Results were scaled to 5  $\mu\text{g}/\text{m}^3$  for fine particulate matter (PM<sub>2.5</sub>), 0.5  $\mu\text{g}/\text{m}^3$  for black carbon (BC), 2  $\mu\text{g}/\text{m}^3$  for sulfate (SO<sub>4</sub><sup>2-</sup>), 20 ppb for nitrogen oxides (NO<sub>x</sub>), and 10 ppb for ozone (O<sub>3</sub>). Error bars indicate the 95% confidence intervals.

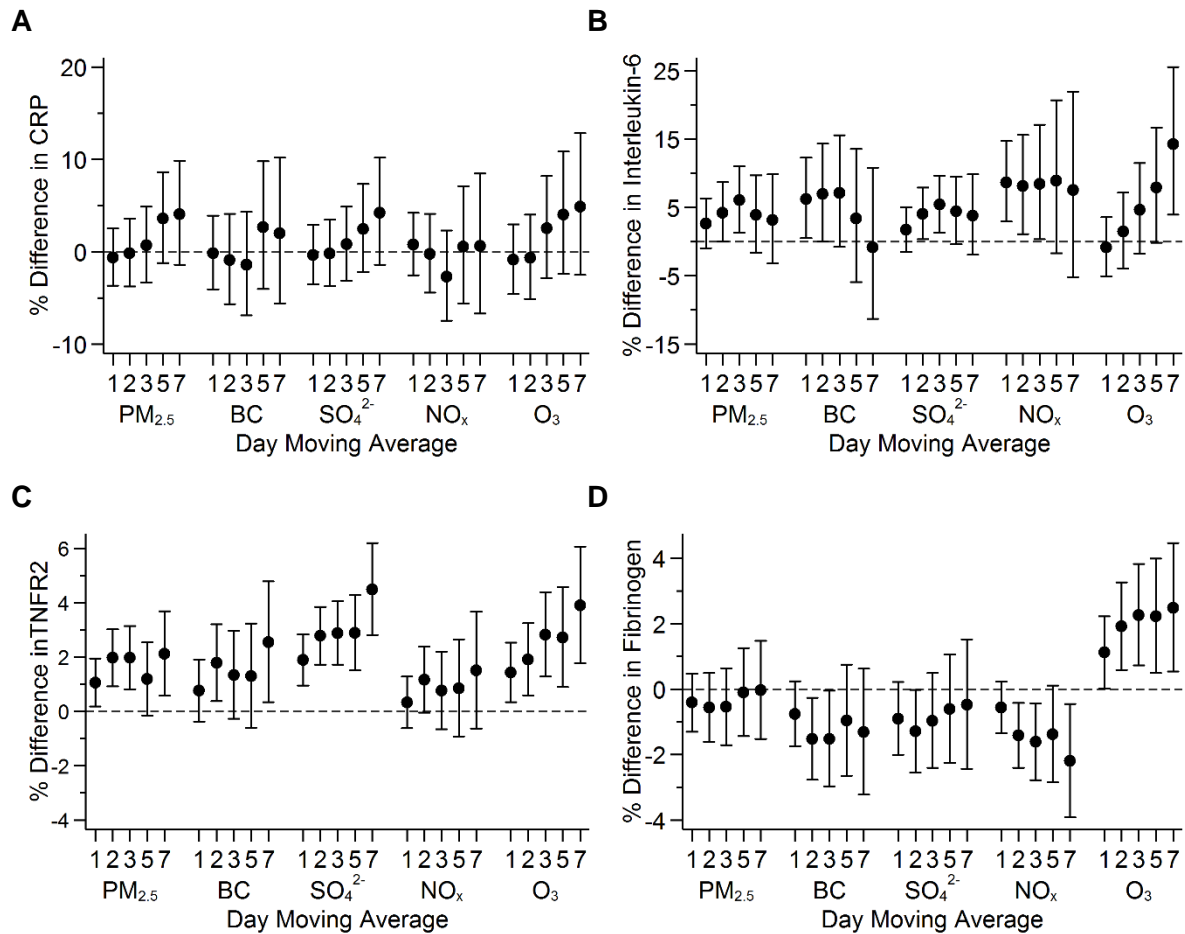



**Supplemental Figure XVII.** Associations of 1- to 7-day moving averages of air pollutants with A)  $\log_e$  C-reactive protein (CRP); B)  $\log_e$  Interleukin-6; C)  $\log_e$  tumor necrosis factor receptor 2 (TNFR2); and D)  $\log_e$  fibrinogen among participants from the Framingham **Third Generation cohort** examination 1 (2002-2005) and/or examination 2 (2008-2011). Models were adjusted for centered age, (centered age)<sup>2</sup>, sex, body mass index, smoking status, pack years, alcohol intake, educational attainment, census tract median household income, date of examination visit, sine and cosine season, day of week, temperature, and relative humidity. An exam identifier was added for CRP. Results were scaled to 5  $\mu\text{g}/\text{m}^3$  for fine particulate matter (PM<sub>2.5</sub>), 0.5  $\mu\text{g}/\text{m}^3$  for black carbon (BC), 2  $\mu\text{g}/\text{m}^3$  for sulfate (SO<sub>4</sub><sup>2-</sup>), 20 ppb for nitrogen oxides (NO<sub>x</sub>), and 10 ppb for ozone (O<sub>3</sub>). Error bars indicate the 95% confidence intervals.

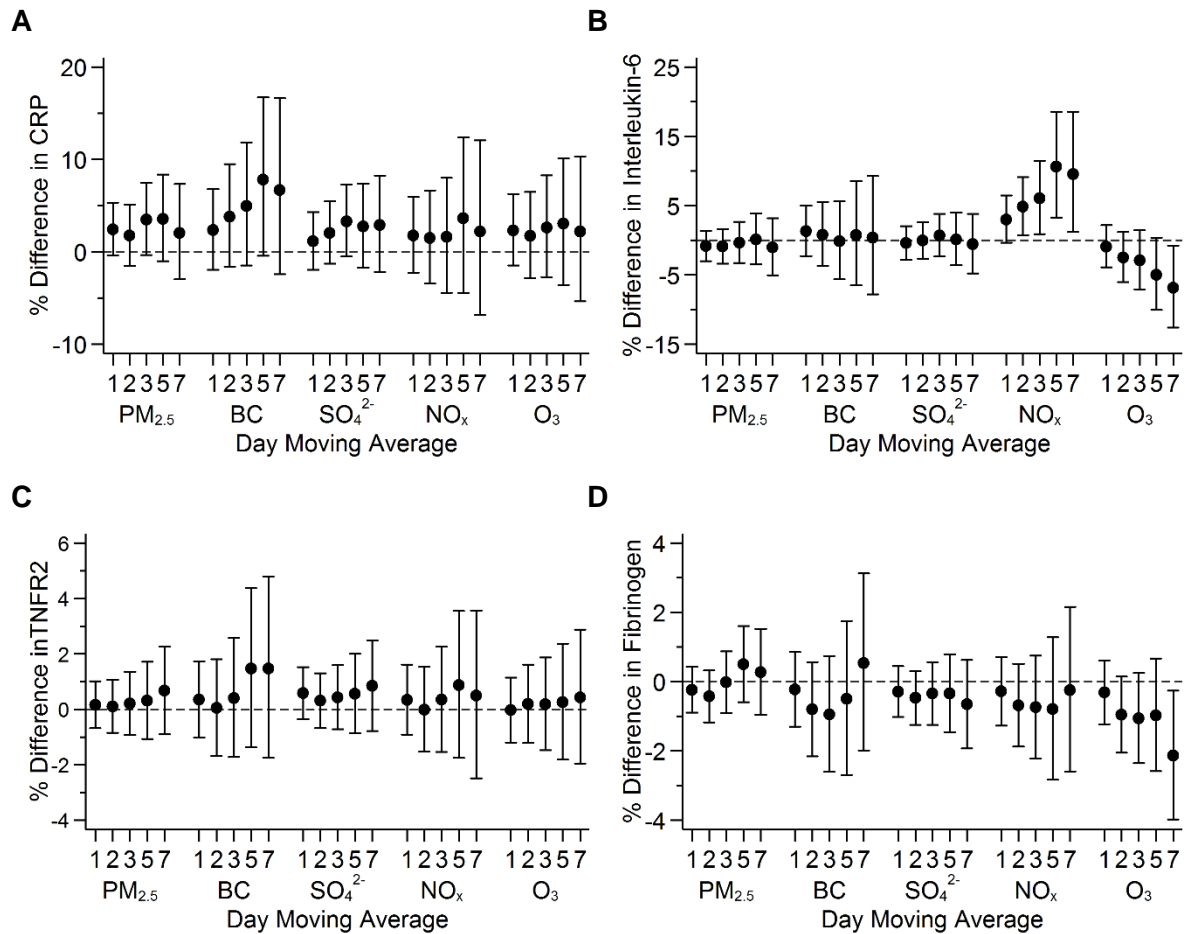

Supplement: NIHMS894402-supplement-Supplemental_Material.pdf [file NIHMS894402-supplement-Supplemental_Material.pdf]
